# Supplementary material for: Adaptive loss of shortwave cone opsins during genomic evolution in cartilaginous fish
Source: bioRxiv preprint, doi:10.1101/2024.05.27.594570, version 1 (2024-05-28)
Supplement: Supplementary Data 2 [file 594570_file04.xlsx]

## Sheet: Sheet 1
Kegg enrichment analysis of 3,530 genes that overlapped with TcMar repeats in skates and rays
Pathway	Gene number	P-value	Q-value	Pathway ID	Level 1	Level 2	Genes	KOs
Axon guidance	78	2.47539e-12	9.18369e-10	ko04360	Organismal Systems	Development and regeneration	Rajpo21170;Rajpo22150;Rajpo22890;Rajpo10235;Rajpo09170;Rajpo09171;Rajpo09172;Rajpo03664;Rajpo05572;Rajpo10257;Rajpo02029;Rajpo13655;Rajpo18828;Rajpo14564;Rajpo06313;Rajpo21075;Rajpo10409;Rajpo00938;Rajpo20135;Rajpo00294;Rajpo08762;Rajpo20478;Rajpo15333;Rajpo13752;Rajpo04852;Rajpo04853;Rajpo04841;Rajpo08154;Rajpo08906;Rajpo04018;Rajpo18125;Rajpo13758;Rajpo05389;Rajpo21063;Rajpo14083;Rajpo16341;Raj…	K06820+K07532+K06838+K06765+K04514+K05859+K06840+K06619+K06842+K05108+K04966+K04969+K24609+K07526+K06841+K04671+K00922+K05104+K05107+K05109+K05111+K05110+K05112+K05106+K07521+K17333+K04968+K06724+K06521+K06226+K05734+K02649+K05736+K04515+K07529+K07528+K05128+K05703+K05704+K18952+K06276+K04348+K05733+K23096+K13578+K06093+K07365+K03083+K00444+K04371+K04630+K05463+K07827+K02833+K04392+K07861+K06268+…
Dopaminergic synapse	61	4.98174e-10	6.16075e-08	ko04728	Organismal Systems	Nervous system	Rajpo08717;Rajpo03439;Rajpo05793;Rajpo05794;Rajpo13479;Rajpo01535;Rajpo10314;Rajpo08282;Rajpo09388;Rajpo11837;Rajpo18964;Rajpo20273;Rajpo11696;Rajpo14731;Rajpo15045;Rajpo22851;Rajpo04229;Rajpo02837;Rajpo09229;Rajpo10626;Rajpo11163;Rajpo11303;Rajpo14577;Rajpo08729;Rajpo16436;Rajpo16015;Rajpo18107;Rajpo19844;Rajpo21742;Rajpo01693;Rajpo02342;Rajpo16654;Rajpo18387;Rajpo18455;Rajpo15558;Rajpo16181;Raj…	K04958+K04344+K04849+K04851+K05209+K08045+K11583+K10396+K05198+K05199+K05200+K03456+K04515+K04354+K11584+K04348+K09048+K00274+K08155+K04450+K00501+K01593+K04632+K04633+K04534+K04539+K03083+K04345+K05870+K04441+K04634+K04630+K06269+K04536+K07825+K04382+K00545+K02183
mTOR signaling pathway	60	3.06318e-09	2.59741e-07	ko04150	Environmental Information Processing	Signal transduction	Rajpo10099;Rajpo09601;Rajpo17773;Rajpo05893;Rajpo05039;Rajpo21732;Rajpo02857;Rajpo05816;Rajpo20280;Rajpo21002;Rajpo11400;Rajpo20478;Rajpo08296;Rajpo06801;Rajpo06720;Rajpo19886;Rajpo21430;Rajpo06995;Rajpo19878;Rajpo13399;Rajpo16048;Rajpo21616;Rajpo15891;Rajpo09698;Rajpo19992;Rajpo00025;Rajpo08852;Rajpo12102;Rajpo15557;Rajpo07621;Rajpo10108;Rajpo00677;Rajpo22670;Rajpo00835;Rajpo06793;Rajpo17117;Raj…	K08267+K03068+K20404+K03099+K04527+K20400+K20401+K20403+K08269+K00922+K02147+K15728+K04369+K04373+K02376+K02649+K04467+K02353+K03258+K14995+K20410+K06276+K20064+K13302+K07198+K02144+K07298+K02148+K03083+K00444+K17532+K01064+K20411+K01110+K07208+K16186+K00182+K00572+K04371+K00312+K08272+K23080+K07827+K02833+K04364+K16185+K03259+K02150+K07205
Ubiquitin mediated proteolysis	55	3.50055e-09	2.59741e-07	ko04120	Genetic Information Processing	Folding, sorting and degradation	Rajpo15063;Rajpo16134;Rajpo09570;Rajpo14764;Rajpo20486;Rajpo07370;Rajpo04871;Rajpo05804;Rajpo02627;Rajpo07108;Rajpo21270;Rajpo22273;Rajpo20574;Rajpo05597;Rajpo09837;Rajpo09817;Rajpo15072;Rajpo03531;Rajpo10589;Rajpo15354;Rajpo22645;Rajpo15507;Rajpo12302;Rajpo21905;Rajpo14458;Rajpo22102;Rajpo16339;Rajpo20100;Rajpo06637;Rajpo14176;Rajpo00952;Rajpo02566;Rajpo17312;Rajpo20824;Rajpo18987;Rajpo14943;Raj…	K10595+K10586+K10594+K03348+K10597+K03352+K05633+K10610+K10699+K03178+K10589+K10614+K10588+K22517+K05632+K04707+K10587+K03351+K10609+K10612+K03347+K07868+K04678+K10260+K03869+K03870+K10685+K03364+K10143+K10264+K10447+K03353+K10456+K03354+K10585+K10604+K10571+K10582+K06689+K10686+K10684+K10570+K10606+K04555+K10144+K20217+K10573+K03357+K10576+K10575
Sphingolipid signaling pathway	51	1.82321e-08	1.10719e-06	ko04071	Environmental Information Processing	Signal transduction	Rajpo03664;Rajpo17112;Rajpo09388;Rajpo05182;Rajpo20478;Rajpo16702;Rajpo06720;Rajpo15045;Rajpo13399;Rajpo18395;Rajpo18484;Rajpo05652;Rajpo21616;Rajpo22851;Rajpo02837;Rajpo09229;Rajpo10626;Rajpo11163;Rajpo21065;Rajpo13552;Rajpo11303;Rajpo11257;Rajpo12102;Rajpo16271;Rajpo05774;Rajpo09770;Rajpo18387;Rajpo18455;Rajpo11125;Rajpo04501;Rajpo13044;Rajpo16604;Rajpo05658;Rajpo05917;Rajpo16108;Rajpo05551;Raj…	K04514+K04426+K11583+K01115+K00922+K18953+K04369+K02649+K18050+K12349+K03456+K04354+K01634+K05703+K11584+K18952+K06276+K00654+K03173+K04639+K23727+K01110+K04371+K04441+K04634+K04714+K04630+K04265+K07827+K02833+K04712+K04382+K04392+K07861
Adrenergic signaling in cardiomyocytes	66	2.08904e-08	1.10719e-06	ko04261	Organismal Systems	Circulatory system	Rajpo01535;Rajpo00331;Rajpo00332;Rajpo00333;Rajpo06909;Rajpo18590;Rajpo04127;Rajpo12991;Rajpo03655;Rajpo08282;Rajpo09388;Rajpo11243;Rajpo01239;Rajpo05550;Rajpo22465;Rajpo01542;Rajpo21576;Rajpo14944;Rajpo04910;Rajpo12598;Rajpo11101;Rajpo19907;Rajpo10439;Rajpo18630;Rajpo15045;Rajpo22851;Rajpo04229;Rajpo02837;Rajpo09229;Rajpo10626;Rajpo11163;Rajpo19518;Rajpo19519;Rajpo11303;Rajpo16015;Rajpo18107;Raj…	K04851+K04838+K04857+K05850+K08048+K08045+K11583+K08041+K04861+K04858+K04860+K08042+K05853+K01539+K05742+K04445+K03456+K04515+K04354+K04862+K11584+K09048+K04450+K04632+K04913+K04345+K09052+K12314+K04371+K05870+K04441+K04634+K04630+K06269+K26206+K04868+K04867+K04382+K10374+K08050+K02183
Wnt signaling pathway	60	3.91998e-08	1.81789e-06	ko04310	Environmental Information Processing	Signal transduction	Rajpo21889;Rajpo09601;Rajpo17773;Rajpo00363;Rajpo22344;Rajpo15451;Rajpo19862;Rajpo00265;Rajpo13758;Rajpo11192;Rajpo05155;Rajpo11123;Rajpo19580;Rajpo14160;Rajpo08965;Rajpo10007;Rajpo00285;Rajpo15945;Rajpo01449;Rajpo02816;Rajpo19878;Rajpo22645;Rajpo15891;Rajpo09698;Rajpo04229;Rajpo11066;Rajpo14577;Rajpo08729;Rajpo16436;Rajpo08935;Rajpo04359;Rajpo16015;Rajpo18107;Rajpo04980;Rajpo09447;Rajpo09128;Raj…	K04498+K03068+K19626+K04496+K04511+K17333+K08399+K04308+K05123+K04309+K05122+K02157+K15694+K03345+K04497+K02376+K03347+K02353+K04515+K05128+K04348+K04468+K08110+K04508+K03213+K04499+K08960+K04492+K03083+K00444+K01064+K04345+K00182+K03097+K00572+K00312+K10151+K23098+K04392+K07861+K10162+K02165+K23097+K04427+K06268
Hippo signaling pathway	63	7.30187e-08	3.00999e-06	ko04390	Environmental Information Processing	Signal transduction	Rajpo04629;Rajpo04631;Rajpo17270;Rajpo08875;Rajpo15127;Rajpo00294;Rajpo17003;Rajpo01571;Rajpo01572;Rajpo08765;Rajpo13463;Rajpo05387;Rajpo10562;Rajpo12274;Rajpo05976;Rajpo12882;Rajpo08965;Rajpo19878;Rajpo19795;Rajpo15891;Rajpo09698;Rajpo22851;Rajpo02837;Rajpo09229;Rajpo10626;Rajpo11163;Rajpo10191;Rajpo11257;Rajpo06925;Rajpo18126;Rajpo02175;Rajpo06046;Rajpo14591;Rajpo18871;Rajpo09447;Rajpo04785;Raj…	K16175+K16798+K16681+K08791+K04671+K06094+K05691+K16819+K21098+K05689+K02157+K02376+K06464+K02353+K03456+K04354+K04388+K18952+K13578+K04673+K04412+K04500+K04676+K03213+K06093+K08959+K08960+K19631+K04492+K04663+K09850+K03083+K00444+K01064+K00182+K00572+K05692+K09854+K00312+K06269+K04382+K16197+K10151+K06630+K18496
Glutamatergic synapse	56	1.86034e-07	6.27442e-06	ko04724	Organismal Systems	Nervous system	Rajpo08717;Rajpo03439;Rajpo01535;Rajpo04947;Rajpo00889;Rajpo00890;Rajpo10314;Rajpo12991;Rajpo03655;Rajpo08282;Rajpo08993;Rajpo04032;Rajpo06494;Rajpo11243;Rajpo01370;Rajpo01371;Rajpo03177;Rajpo21576;Rajpo05182;Rajpo21149;Rajpo18801;Rajpo17591;Rajpo03678;Rajpo20273;Rajpo16087;Rajpo20944;Rajpo12578;Rajpo11696;Rajpo14731;Rajpo05839;Rajpo00997;Rajpo16451;Rajpo20463;Rajpo00568;Rajpo22944;Rajpo14577;Raj…	K04958+K04344+K04851+K15009+K05209+K08048+K08045+K05201+K05202+K05203+K08041+K04603+K04604+K08042+K01115+K05213+K05214+K15008+K05198+K04607+K04609+K04610+K05199+K05200+K00910+K01425+K13576+K05613+K12302+K04348+K05614+K05617+K05618+K04632+K04534+K04539+K04345+K01915+K04371+K04634+K15010+K04630+K04536+K07825+K06268
Endocytosis	89	3.60491e-07	1.11452e-05	ko04144	Cellular Processes	Transport and catabolism	Rajpo12241;Rajpo11420;Rajpo08665;Rajpo21067;Rajpo19787;Rajpo11263;Rajpo17220;Rajpo01730;Rajpo22782;Rajpo09753;Rajpo19602;Rajpo11383;Rajpo04871;Rajpo20932;Rajpo11534;Rajpo05182;Rajpo09975;Rajpo01067;Rajpo01994;Rajpo10164;Rajpo13602;Rajpo14168;Rajpo11837;Rajpo18964;Rajpo05597;Rajpo06704;Rajpo09837;Rajpo20513;Rajpo09817;Rajpo04903;Rajpo20565;Rajpo19144;Rajpo21905;Rajpo02474;Rajpo17821;Rajpo09459;Raj…	K06564+K04646+K18443+K18442+K18440+K04679+K18462+K12491+K12484+K12488+K12495+K05633+K18465+K18464+K01115+K11825+K01528+K23484+K09526+K10396+K22517+K12472+K05632+K12200+K04707+K12480+K12487+K18468+K04678+K05737+K12482+K00910+K12470+K04388+K12471+K08291+K05704+K18952+K04705+K00889+K12476+K12483+K23612+K19475+K18441+K12486+K04500+K12196+K06093+K17260+K19368+K12183+K21269+K11247+K12186+K02833+K10364+…
Long-term depression	30	5.74104e-07	1.52137e-05	ko04730	Organismal Systems	Nervous system	Rajpo01039;Rajpo11762;Rajpo08717;Rajpo03439;Rajpo00957;Rajpo12640;Rajpo01370;Rajpo01371;Rajpo04561;Rajpo20273;Rajpo11696;Rajpo06720;Rajpo15551;Rajpo05647;Rajpo09735;Rajpo22851;Rajpo02311;Rajpo10821;Rajpo02934;Rajpo04501;Rajpo05917;Rajpo15950;Rajpo08467;Rajpo16448;Rajpo14637;Rajpo21048;Rajpo05907;Rajpo05229;Rajpo10297;Rajpo00801	K04961+K04958+K04344+K13240+K19477+K04603+K05207+K05198+K05199+K04369+K07376+K03456+K05854+K04632+K04534+K04639+K04371+K04635+K04634+K04630+K04535+K07827+K02833+K04382
Neurotrophin signaling pathway	44	6.72157e-06	0.000166247	ko04722	Organismal Systems	Nervous system	Rajpo05039;Rajpo21732;Rajpo17112;Rajpo05572;Rajpo02029;Rajpo20478;Rajpo14537;Rajpo06720;Rajpo19886;Rajpo21430;Rajpo06995;Rajpo00209;Rajpo11691;Rajpo17887;Rajpo17889;Rajpo20310;Rajpo10439;Rajpo18630;Rajpo13399;Rajpo21616;Rajpo04229;Rajpo11603;Rajpo11113;Rajpo12102;Rajpo16015;Rajpo18107;Rajpo05167;Rajpo12325;Rajpo02385;Rajpo17117;Rajpo05917;Rajpo16108;Rajpo05551;Rajpo16475;Rajpo05229;Rajpo10297;Raj…	K03099+K04426+K05859+K06619+K00922+K09593+K04369+K04373+K04360+K12388+K05101+K04445+K02649+K04515+K09408+K17448+K06276+K12461+K04463+K04431+K03083+K04371+K04441+K07827+K02833+K04364+K04392+K06630+K12462+K07836+K02183
Long-term potentiation	33	8.36606e-06	0.000193988	ko04720	Organismal Systems	Nervous system	Rajpo08717;Rajpo21889;Rajpo10314;Rajpo12991;Rajpo03655;Rajpo11243;Rajpo01370;Rajpo01371;Rajpo03177;Rajpo20273;Rajpo06720;Rajpo19886;Rajpo21430;Rajpo06995;Rajpo04229;Rajpo14577;Rajpo08729;Rajpo16436;Rajpo16015;Rajpo18107;Rajpo13839;Rajpo06209;Rajpo05917;Rajpo08467;Rajpo14935;Rajpo17569;Rajpo05229;Rajpo10297;Rajpo12180;Rajpo08203;Rajpo05940;Rajpo04824;Rajpo18634	K04958+K04498+K05209+K08048+K08041+K04603+K04604+K05198+K04369+K04373+K04515+K04348+K04345+K04371+K04634+K06269+K07827+K02833+K08050+K07836+K06268+K02183
AMPK signaling pathway	42	9.63846e-06	0.000195634	ko04152	Environmental Information Processing	Signal transduction	Rajpo11207;Rajpo02857;Rajpo09388;Rajpo20478;Rajpo15045;Rajpo13399;Rajpo21616;Rajpo22851;Rajpo11603;Rajpo02837;Rajpo09229;Rajpo10626;Rajpo11163;Rajpo11303;Rajpo12102;Rajpo10108;Rajpo00677;Rajpo07866;Rajpo20006;Rajpo16995;Rajpo03169;Rajpo19844;Rajpo05578;Rajpo00835;Rajpo18387;Rajpo18455;Rajpo06719;Rajpo22615;Rajpo07868;Rajpo03988;Rajpo01270;Rajpo01271;Rajpo13330;Rajpo20787;Rajpo06733;Rajpo00801;Raj…	K11262+K04527+K11583+K00922+K02649+K03456+K09408+K04354+K11584+K06276+K07198+K07200+K01103+K19029+K09048+K01578+K07298+K17532+K07208+K05870+K03841+K08272+K13088+K04382+K07901+K07905+K07877+K07903+K04427+K07205
Axon regeneration	39	9.72789e-06	0.000195634	ko04361	Organismal Systems	Development and regeneration	Rajpo01535;Rajpo22890;Rajpo22534;Rajpo22509;Rajpo02857;Rajpo22773;Rajpo20478;Rajpo08154;Rajpo03276;Rajpo00289;Rajpo20161;Rajpo15695;Rajpo19951;Rajpo19952;Rajpo19954;Rajpo19401;Rajpo04611;Rajpo12259;Rajpo05275;Rajpo11891;Rajpo11603;Rajpo10108;Rajpo00677;Rajpo09202;Rajpo15558;Rajpo16181;Rajpo10821;Rajpo15229;Rajpo02934;Rajpo02385;Rajpo13839;Rajpo06209;Rajpo05658;Rajpo16108;Rajpo05551;Rajpo08467;Raj…	K04851+K07532+K00901+K04527+K23488+K00922+K05110+K04422+K12035+K11593+K06704+K10393+K04459+K09408+K07198+K00502+K01593+K04632+K23439+K04534+K04431+K04345+K01110+K04441+K04634+K04392
Cellular senescence	56	1.09411e-05	0.000195634	ko04218	Cellular Processes	Cell growth and death	Rajpo08717;Rajpo07691;Rajpo01535;Rajpo01490;Rajpo04256;Rajpo10155;Rajpo20478;Rajpo13758;Rajpo20794;Rajpo06720;Rajpo13399;Rajpo02079;Rajpo21616;Rajpo19153;Rajpo11603;Rajpo10191;Rajpo14577;Rajpo08729;Rajpo16436;Rajpo06925;Rajpo00648;Rajpo12530;Rajpo14591;Rajpo22709;Rajpo07310;Rajpo02238;Rajpo09842;Rajpo14442;Rajpo05658;Rajpo07868;Rajpo05917;Rajpo12134;Rajpo20064;Rajpo16108;Rajpo05551;Rajpo16475;Raj…	K04958+K06640+K04851+K04982+K08826+K16332+K00922+K17333+K06618+K04369+K02649+K21776+K10865+K09408+K04388+K04348+K06641+K02216+K04500+K10752+K08015+K17454+K06620+K01110+K07208+K04371+K04432+K04433+K04441+K06269+K02091+K05863+K07827+K02833+K10151+K10994+K02830+K07830+K06268+K21775+K02183+K07205
Adherens junction	37	1.10736e-05	0.000195634	ko04520	Cellular Processes	Cellular community - eukaryotes	Rajpo21889;Rajpo05159;Rajpo09938;Rajpo12237;Rajpo00053;Rajpo00054;Rajpo19407;Rajpo02857;Rajpo15976;Rajpo01571;Rajpo01572;Rajpo08765;Rajpo13463;Rajpo01905;Rajpo12274;Rajpo05976;Rajpo12882;Rajpo17084;Rajpo10191;Rajpo13552;Rajpo21032;Rajpo03669;Rajpo08935;Rajpo06925;Rajpo20091;Rajpo01780;Rajpo09056;Rajpo00796;Rajpo00861;Rajpo16119;Rajpo12357;Rajpo12361;Rajpo05917;Rajpo05312;Rajpo10723;Rajpo16290;Raj…	K04498+K05694+K05695+K05702+K16848+K05693+K04527+K05700+K05691+K05699+K05689+K08889+K04388+K05703+K05704+K05705+K04468+K05627+K23612+K05696+K04492+K03097+K05692+K04371+K04392+K07861+K04427
Cell cycle	44	1.21627e-05	0.000205107	ko04110	Cellular Processes	Cell growth and death	Rajpo07691;Rajpo21889;Rajpo14764;Rajpo00704;Rajpo12059;Rajpo07370;Rajpo04136;Rajpo02029;Rajpo10155;Rajpo15227;Rajpo20794;Rajpo03531;Rajpo21367;Rajpo09187;Rajpo22645;Rajpo06637;Rajpo09606;Rajpo07601;Rajpo18997;Rajpo20824;Rajpo19852;Rajpo14943;Rajpo22776;Rajpo08505;Rajpo19488;Rajpo07884;Rajpo00648;Rajpo12530;Rajpo14591;Rajpo07695;Rajpo11833;Rajpo09842;Rajpo14442;Rajpo17117;Rajpo13406;Rajpo03223;Raj…	K06640+K04498+K03348+K06671+K06669+K03352+K06619+K16332+K06670+K06618+K03351+K02542+K02541+K03347+K03364+K06632+K02605+K06639+K03353+K03354+K02604+K02213+K06067+K06641+K02216+K04500+K09392+K02606+K17454+K06620+K03083+K02202+K02091+K02180+K16197+K10151+K06630+K02537+K03357
Synaptic vesicle cycle	37	1.38254e-05	0.00022301	ko04721	Organismal Systems	Nervous system	Rajpo01107;Rajpo03439;Rajpo05793;Rajpo05794;Rajpo13479;Rajpo11420;Rajpo08665;Rajpo09975;Rajpo08296;Rajpo01067;Rajpo01994;Rajpo10164;Rajpo01617;Rajpo06491;Rajpo20563;Rajpo02468;Rajpo03880;Rajpo13764;Rajpo09318;Rajpo21784;Rajpo20463;Rajpo00568;Rajpo22944;Rajpo11211;Rajpo18761;Rajpo05824;Rajpo01693;Rajpo22670;Rajpo18021;Rajpo06793;Rajpo19905;Rajpo06343;Rajpo20974;Rajpo11777;Rajpo17779;Rajpo08186;Raj…	K15293+K04344+K04849+K04646+K11825+K02147+K01528+K23484+K02154+K05038+K05037+K05035+K18211+K05613+K12302+K05614+K05617+K05618+K08155+K02144+K15290+K02148+K02146+K07882+K15296+K02150+K15295+K15294
Phosphatidylinositol signaling system	37	2.12927e-05	0.000329149	ko04070	Environmental Information Processing	Signal transduction	Rajpo08717;Rajpo13571;Rajpo18728;Rajpo19874;Rajpo22534;Rajpo22509;Rajpo05572;Rajpo03191;Rajpo22385;Rajpo22542;Rajpo20478;Rajpo14534;Rajpo14535;Rajpo03276;Rajpo00231;Rajpo11021;Rajpo20161;Rajpo04611;Rajpo13399;Rajpo21775;Rajpo21616;Rajpo05715;Rajpo06306;Rajpo05714;Rajpo01292;Rajpo10795;Rajpo16685;Rajpo10237;Rajpo02561;Rajpo20723;Rajpo12633;Rajpo04466;Rajpo19530;Rajpo00771;Rajpo05658;Rajpo04824;Raj…	K04958+K05860+K00888+K00923+K00901+K05859+K18082+K21798+K03084+K00922+K01109+K01099+K00914+K02649+K18083+K18081+K01108+K21797+K00889+K10572+K13711+K00915+K00911+K00981+K00920+K01106+K01110+K02183
Vasopressin-regulated water reabsorption	21	3.28736e-05	0.000469081	ko04962	Organismal Systems	Excretory system	Rajpo05060;Rajpo21506;Rajpo22289;Rajpo22290;Rajpo15295;Rajpo16927;Rajpo19844;Rajpo03378;Rajpo07141;Rajpo10821;Rajpo06719;Rajpo13839;Rajpo06209;Rajpo15434;Rajpo03988;Rajpo18788;Rajpo01476;Rajpo00144;Rajpo13018;Rajpo00324;Rajpo05669	K10413+K10414+K10415+K09048+K10416+K04632+K04345+K10417+K05870+K07905+K07904+K07887+K07888+K12462
Oocyte meiosis	47	5.34716e-05	0.000708499	ko04114	Cellular Processes	Cell growth and death	Rajpo08717;Rajpo14764;Rajpo12059;Rajpo07370;Rajpo12991;Rajpo03655;Rajpo08282;Rajpo11243;Rajpo21576;Rajpo19886;Rajpo21430;Rajpo06995;Rajpo03531;Rajpo00398;Rajpo22645;Rajpo06312;Rajpo08776;Rajpo22851;Rajpo04229;Rajpo20824;Rajpo11303;Rajpo14577;Rajpo08729;Rajpo16436;Rajpo14943;Rajpo16015;Rajpo18107;Rajpo18387;Rajpo18455;Rajpo13839;Rajpo06209;Rajpo05917;Rajpo16108;Rajpo05551;Rajpo16475;Rajpo14935;Raj…	K04958+K03348+K06669+K03352+K08048+K08045+K08041+K08042+K04373+K03351+K02602+K03347+K08556+K03456+K04515+K03353+K11584+K04348+K03354+K04345+K04371+K04441+K06269+K04382+K16197+K06630+K02537+K03357+K06268+K02183
B cell receptor signaling pathway	30	0.000102448	0.00126694	ko04662	Organismal Systems	Immune system	Rajpo05039;Rajpo21732;Rajpo05572;Rajpo06849;Rajpo22542;Rajpo20478;Rajpo13758;Rajpo06720;Rajpo11638;Rajpo08180;Rajpo08730;Rajpo13399;Rajpo22314;Rajpo16048;Rajpo21616;Rajpo02610;Rajpo14577;Rajpo08729;Rajpo16436;Rajpo02311;Rajpo09199;Rajpo17117;Rajpo05917;Rajpo05229;Rajpo10297;Rajpo04111;Rajpo05312;Rajpo10723;Rajpo16290;Rajpo05940	K03099+K05859+K07367+K03084+K00922+K17333+K04369+K05730+K07369+K12230+K02649+K04467+K07371+K04348+K05854+K06508+K03083+K04371+K07827+K02833+K04364+K04392+K07861+K06268
Notch signaling pathway	21	0.000153121	0.00177525	ko04330	Environmental Information Processing	Signal transduction	Rajpo16807;Rajpo21889;Rajpo21783;Rajpo20153;Rajpo06308;Rajpo06866;Rajpo22344;Rajpo15451;Rajpo19862;Rajpo00602;Rajpo00142;Rajpo19473;Rajpo15945;Rajpo01449;Rajpo02816;Rajpo15891;Rajpo09698;Rajpo12494;Rajpo07884;Rajpo03537;Rajpo12661	K20995+K04498+K06052+K06061+K04496+K06059+K06062+K04497+K02353+K06058+K06067+K06053+K06172
ErbB signaling pathway	29	0.000169157	0.0018458	ko04012	Environmental Information Processing	Signal transduction	Rajpo05039;Rajpo21732;Rajpo19122;Rajpo05572;Rajpo02029;Rajpo20478;Rajpo05597;Rajpo14537;Rajpo09817;Rajpo06720;Rajpo01906;Rajpo01620;Rajpo13399;Rajpo21616;Rajpo21790;Rajpo04229;Rajpo11113;Rajpo21032;Rajpo08070;Rajpo16015;Rajpo18107;Rajpo02385;Rajpo09394;Rajpo17117;Rajpo05917;Rajpo05229;Rajpo10297;Rajpo04111;Rajpo15508	K03099+K05085+K05859+K06619+K00922+K22517+K09593+K04707+K04369+K05734+K11224+K02649+K05736+K04515+K17448+K05704+K05733+K04431+K07365+K03083+K04371+K07827+K02833+K04364+K07205
Alanine, aspartate and glutamate metabolism	16	0.000246279	0.00261055	ko00250	Metabolism	Amino acid metabolism	Rajpo07769;Rajpo04470;Rajpo17833;Rajpo00997;Rajpo16631;Rajpo09507;Rajpo10848;Rajpo03558;Rajpo01980;Rajpo22573;Rajpo14040;Rajpo11250;Rajpo17943;Rajpo19032;Rajpo10491;Rajpo13286	K11540+K00820+K01425+K01580+K00764+K13524+K01940+K00830+K14455+K14454+K01915+K18310+K13566+K18309
MAPK signaling pathway	86	0.000272295	0.00273031	ko04010	Environmental Information Processing	Signal transduction	Rajpo11386;Rajpo17945;Rajpo17947;Rajpo17950;Rajpo03439;Rajpo17949;Rajpo05793;Rajpo05794;Rajpo13479;Rajpo01535;Rajpo06909;Rajpo12247;Rajpo20282;Rajpo06873;Rajpo05039;Rajpo21732;Rajpo02857;Rajpo19122;Rajpo08407;Rajpo17112;Rajpo01239;Rajpo05550;Rajpo22465;Rajpo01542;Rajpo00959;Rajpo02476;Rajpo13758;Rajpo00289;Rajpo06720;Rajpo19886;Rajpo21430;Rajpo06995;Rajpo21728;Rajpo02248;Rajpo00209;Rajpo22835;Raj…	K08052+K04852+K04344+K04849+K04851+K04857+K04428+K08018+K05097+K03099+K04527+K05085+K04436+K04426+K04861+K04858+K04860+K04429+K17333+K04422+K04369+K04373+K04406+K04424+K04360+K04350+K04445+K04467+K04459+K04862+K04388+K04348+K03173+K04468+K04378+K04454+K04411+K04412+K04450+K05466+K04460+K04461+K04463+K05449+K04431+K04345+K17614+K04371+K04432+K04433+K05450+K04441+K04358+K07827+K02833+K04868+K04867+…
cGMP-PKG signaling pathway	59	0.000323774	0.00316106	ko04022	Environmental Information Processing	Signal transduction	Rajpo08717;Rajpo01535;Rajpo20686;Rajpo06909;Rajpo03664;Rajpo02857;Rajpo16041;Rajpo12640;Rajpo18590;Rajpo04127;Rajpo12991;Rajpo03655;Rajpo06030;Rajpo08282;Rajpo11243;Rajpo06313;Rajpo21576;Rajpo09571;Rajpo14944;Rajpo04910;Rajpo12487;Rajpo12598;Rajpo11101;Rajpo13758;Rajpo06720;Rajpo18395;Rajpo18484;Rajpo15551;Rajpo05647;Rajpo09735;Rajpo14577;Rajpo08729;Rajpo16436;Rajpo14803;Rajpo19844;Rajpo22292;Raj…	K04958+K04851+K00907+K04857+K04514+K04527+K04936+K19477+K05850+K08048+K13296+K08045+K08041+K04969+K08042+K12324+K05853+K03121+K01539+K17333+K04369+K18050+K07376+K04348+K04378+K09048+K04454+K04450+K04197+K04639+K04371+K05870+K04635+K04634+K04630+K06269+K04265+K05863+K04941+K06268+K12755+K02183
Regulation of actin cytoskeleton	71	0.000416306	0.00369924	ko04810	Cellular Processes	Cell motility	Rajpo20686;Rajpo16518;Rajpo11998;Rajpo22334;Rajpo22336;Rajpo04422;Rajpo12004;Rajpo16875;Rajpo00053;Rajpo00054;Rajpo22890;Rajpo20586;Rajpo05039;Rajpo21732;Rajpo03664;Rajpo06954;Rajpo15058;Rajpo00634;Rajpo00636;Rajpo16837;Rajpo15976;Rajpo00246;Rajpo20478;Rajpo13274;Rajpo12607;Rajpo01905;Rajpo06720;Rajpo11638;Rajpo20811;Rajpo19907;Rajpo01906;Rajpo02792;Rajpo06933;Rajpo19795;Rajpo13399;Rajpo20988;Raj…	K00907+K10352+K13708+K05767+K03994+K16848+K07532+K05732+K03099+K04514+K05769+K05749+K06481+K06480+K05745+K05700+K06482+K00922+K06584+K06487+K05699+K04369+K05730+K13710+K05742+K05734+K06589+K06588+K06464+K02649+K05741+K05737+K05736+K05768+K06524+K05762+K08007+K05704+K05733+K05751+K00889+K05627+K23612+K17260+K00920+K04639+K05692+K04371+K05450+K06269+K04358+K07827+K02833+K05726+K04392+K07861+K07830+…
Valine, leucine and isoleucine degradation	18	0.000633699	0.00534323	ko00280	Metabolism	Amino acid metabolism	Rajpo00823;Rajpo17567;Rajpo03184;Rajpo03945;Rajpo10089;Rajpo18999;Rajpo11399;Rajpo20928;Rajpo03558;Rajpo00824;Rajpo10754;Rajpo18732;Rajpo12626;Rajpo14841;Rajpo15374;Rajpo11121;Rajpo14892;Rajpo00795	K07515+K01968+K01907+K01969+K01641+K09699+K00128+K00382+K13524+K07509+K00253+K11538+K05605+K00167+K01640+K05607+K00020+K00022
Autophagy - animal	42	0.000652388	0.00537858	ko04140	Cellular Processes	Transport and catabolism	Rajpo08717;Rajpo19232;Rajpo11889;Rajpo03191;Rajpo11400;Rajpo20478;Rajpo10735;Rajpo12120;Rajpo06720;Rajpo11021;Rajpo06395;Rajpo20353;Rajpo13399;Rajpo21616;Rajpo17170;Rajpo12102;Rajpo10108;Rajpo00677;Rajpo00835;Rajpo14153;Rajpo01610;Rajpo06725;Rajpo18201;Rajpo04505;Rajpo13839;Rajpo06209;Rajpo05658;Rajpo07868;Rajpo07610;Rajpo05917;Rajpo05229;Rajpo10297;Rajpo12582;Rajpo15005;Rajpo00801;Rajpo00844;Raj…	K04958+K17906+K17985+K18082+K08269+K00922+K17603+K08852+K04369+K00914+K17907+K17889+K02649+K08337+K06276+K07198+K07298+K08342+K08334+K08803+K17908+K04345+K01110+K07208+K16186+K04371+K07827+K02833+K08343+K16185+K04382+K07901+K07874+K07830+K04427+K08341+K10435
FoxO signaling pathway	40	0.000713244	0.00575247	ko04068	Environmental Information Processing	Signal transduction	Rajpo21889;Rajpo05039;Rajpo21732;Rajpo02857;Rajpo01370;Rajpo01371;Rajpo10155;Rajpo20478;Rajpo06720;Rajpo13399;Rajpo16048;Rajpo21616;Rajpo17807;Rajpo11603;Rajpo10191;Rajpo12102;Rajpo07621;Rajpo04665;Rajpo08935;Rajpo06925;Rajpo10108;Rajpo00677;Rajpo07866;Rajpo20006;Rajpo11879;Rajpo00872;Rajpo00835;Rajpo05321;Rajpo05658;Rajpo05917;Rajpo16108;Rajpo05551;Rajpo16475;Rajpo13413;Rajpo05229;Rajpo10297;Raj…	K04498+K03099+K04527+K04603+K16332+K00922+K04369+K02649+K04467+K17847+K09408+K04388+K06276+K13302+K13303+K04468+K07198+K07200+K03781+K04411+K07298+K08960+K01110+K04371+K04441+K15010+K07827+K02833+K04364+K08862+K10151+K08341
Prolactin signaling pathway	22	0.00083309	0.00643909	ko04917	Organismal Systems	Endocrine system	Rajpo05039;Rajpo21732;Rajpo08237;Rajpo20478;Rajpo06720;Rajpo00998;Rajpo01620;Rajpo13399;Rajpo21616;Rajpo11603;Rajpo11113;Rajpo21032;Rajpo16654;Rajpo17117;Rajpo05917;Rajpo16108;Rajpo05551;Rajpo16475;Rajpo05229;Rajpo10297;Rajpo04111;Rajpo04085	K03099+K04447+K00922+K04369+K11220+K11224+K02649+K09408+K17448+K05704+K00501+K03083+K04371+K04441+K07827+K02833+K04364+K10151
Insulin signaling pathway	46	0.00115069	0.00853809	ko04910	Organismal Systems	Endocrine system	Rajpo11207;Rajpo09938;Rajpo05039;Rajpo21732;Rajpo02857;Rajpo06030;Rajpo17028;Rajpo20478;Rajpo05597;Rajpo09463;Rajpo01190;Rajpo09817;Rajpo06720;Rajpo13399;Rajpo21616;Rajpo11113;Rajpo08140;Rajpo11257;Rajpo12102;Rajpo16809;Rajpo10108;Rajpo00677;Rajpo07866;Rajpo20006;Rajpo09056;Rajpo11438;Rajpo17117;Rajpo00771;Rajpo13839;Rajpo06209;Rajpo07868;Rajpo12394;Rajpo05917;Rajpo04577;Rajpo01270;Rajpo01271;Raj…	K11262+K05695+K03099+K04527+K13296+K07190+K00922+K22517+K00844+K04707+K04369+K02649+K17448+K04739+K18952+K06276+K07196+K07198+K07200+K05696+K07192+K03083+K01106+K04345+K07208+K00871+K04371+K03841+K06269+K07827+K02833+K04364+K03259+K02183+K07205
Lysine degradation	23	0.00142483	0.0101656	ko00310	Metabolism	Amino acid metabolism	Rajpo04193;Rajpo01133;Rajpo14610;Rajpo04234;Rajpo04444;Rajpo01789;Rajpo16989;Rajpo09598;Rajpo22601;Rajpo22644;Rajpo00823;Rajpo09486;Rajpo18656;Rajpo13842;Rajpo01991;Rajpo19578;Rajpo11399;Rajpo20928;Rajpo09802;Rajpo07431;Rajpo02458;Rajpo15443;Rajpo00795	K09186+K11423+K11424+K11425+K11420+K14157+K15791+K11429+K13645+K11430+K07515+K20795+K11703+K00471+K00128+K00382+K00658+K11426+K00306+K18826+K00022
Nucleotide excision repair	16	0.00149011	0.0102376	ko03420	Genetic Information Processing	Replication and repair	Rajpo05847;Rajpo16000;Rajpo05804;Rajpo06111;Rajpo08391;Rajpo10589;Rajpo11404;Rajpo05603;Rajpo07579;Rajpo04921;Rajpo05051;Rajpo16441;Rajpo01016;Rajpo13406;Rajpo00955;Rajpo15304	K02324+K10841+K10610+K02327+K10848+K10609+K07466+K03144+K10755+K02325+K10570+K02202+K10756+K10740
ABC transporters	16	0.00149011	0.0102376	ko02010	Environmental Information Processing	Membrane transport	Rajpo14393;Rajpo06837;Rajpo18067;Rajpo01352;Rajpo17581;Rajpo12968;Rajpo06981;Rajpo14909;Rajpo07908;Rajpo22856;Rajpo06394;Rajpo16433;Rajpo18802;Rajpo15437;Rajpo09787;Rajpo15436	K05641+K05674+K05668+K05673+K05658+K05676+K05661+K05657+K05677+K05680+K05655+K05681+K05684+K05678+K05683
Inositol phosphate metabolism	26	0.00153765	0.0103325	ko00562	Metabolism	Carbohydrate metabolism	Rajpo13571;Rajpo18728;Rajpo19874;Rajpo04968;Rajpo05572;Rajpo03191;Rajpo22385;Rajpo22542;Rajpo20478;Rajpo14534;Rajpo14535;Rajpo00231;Rajpo11021;Rajpo21775;Rajpo05715;Rajpo06306;Rajpo05714;Rajpo01292;Rajpo10795;Rajpo16685;Rajpo10237;Rajpo02561;Rajpo20723;Rajpo19530;Rajpo00771;Rajpo05658	K05860+K00888+K00923+K19006+K05859+K18082+K21798+K03084+K00922+K01109+K01099+K00914+K18083+K18081+K01108+K21797+K00889+K10572+K13711+K00915+K00911+K00920+K01106+K01110
Mitophagy - animal	22	0.00155963	0.0103325	ko04137	Cellular Processes	Transport and catabolism	Rajpo11889;Rajpo01595;Rajpo14260;Rajpo14893;Rajpo06395;Rajpo11506;Rajpo05149;Rajpo11603;Rajpo22026;Rajpo21032;Rajpo17777;Rajpo01610;Rajpo09842;Rajpo00861;Rajpo16119;Rajpo05229;Rajpo10297;Rajpo16505;Rajpo06033;Rajpo21739;Rajpo08324;Rajpo22583	K17985+K17987+K21343+K21347+K17907+K07870+K20168+K09408+K07871+K05704+K15485+K08334+K17454+K03097+K07827+K02833+K07830+K17986+K08341+K10435
Glycerophospholipid metabolism	29	0.0021451	0.0137213	ko00564	Metabolism	Lipid metabolism	Rajpo08288;Rajpo22534;Rajpo22509;Rajpo17343;Rajpo05182;Rajpo03276;Rajpo06801;Rajpo20161;Rajpo04611;Rajpo12066;Rajpo14406;Rajpo08689;Rajpo13888;Rajpo14850;Rajpo20072;Rajpo03854;Rajpo16834;Rajpo03567;Rajpo18459;Rajpo17248;Rajpo12633;Rajpo04466;Rajpo00127;Rajpo04642;Rajpo14769;Rajpo21706;Rajpo09493;Rajpo22382;Rajpo22666	K00629+K00901+K14676+K01115+K15728+K18695+K01049+K13517+K13510+K00995+K13514+K13506+K00981+K00967+K00894+K19007+K01080+K18693+K06128
Progesterone-mediated oocyte maturation	35	0.00251825	0.0158323	ko04914	Organismal Systems	Endocrine system	Rajpo14764;Rajpo07370;Rajpo12991;Rajpo03655;Rajpo06030;Rajpo08282;Rajpo11243;Rajpo21576;Rajpo20478;Rajpo15464;Rajpo19886;Rajpo21430;Rajpo06995;Rajpo03531;Rajpo00398;Rajpo06312;Rajpo13399;Rajpo05059;Rajpo21616;Rajpo06637;Rajpo08776;Rajpo20824;Rajpo14943;Rajpo13839;Rajpo06209;Rajpo05917;Rajpo16108;Rajpo05551;Rajpo16475;Rajpo16448;Rajpo14637;Rajpo21048;Rajpo05229;Rajpo18094;Rajpo18864	K03348+K03352+K08048+K13296+K08045+K08041+K08042+K00922+K08837+K04373+K03351+K02602+K08556+K02649+K04079+K03364+K03353+K03354+K04345+K04371+K04441+K04630+K07827+K02537+K03357
Selenocompound metabolism	8	0.00271741	0.0165272	ko00450	Metabolism	Metabolism of other amino acids	Rajpo20581;Rajpo20608;Rajpo00793;Rajpo05655;Rajpo11759;Rajpo02492;Rajpo22575;Rajpo03953	K00548+K22182+K13811+K03341+K01763+K01758
Melanogenesis	38	0.00293735	0.0175767	ko04916	Organismal Systems	Endocrine system	Rajpo21889;Rajpo12991;Rajpo03655;Rajpo08282;Rajpo11243;Rajpo21576;Rajpo06720;Rajpo19878;Rajpo15891;Rajpo09698;Rajpo04229;Rajpo16015;Rajpo18107;Rajpo19844;Rajpo10821;Rajpo06719;Rajpo02934;Rajpo00796;Rajpo17117;Rajpo22463;Rajpo19461;Rajpo13839;Rajpo06209;Rajpo02948;Rajpo13138;Rajpo14511;Rajpo01224;Rajpo05917;Rajpo03988;Rajpo08467;Rajpo22098;Rajpo16448;Rajpo14637;Rajpo21048;Rajpo05229;Rajpo10297;Raj…	K04498+K08048+K08045+K08041+K08042+K04369+K02376+K02353+K04515+K09048+K04632+K04534+K04492+K03083+K00444+K01064+K04345+K00182+K00572+K04371+K05870+K04634+K00312+K04630+K07827+K02833+K02183
TGF-beta signaling pathway	30	0.00344753	0.0199849	ko04350	Environmental Information Processing	Signal transduction	Rajpo12749;Rajpo21889;Rajpo08545;Rajpo21562;Rajpo17220;Rajpo03664;Rajpo00294;Rajpo22645;Rajpo21905;Rajpo22851;Rajpo11003;Rajpo10191;Rajpo06925;Rajpo02806;Rajpo02873;Rajpo18126;Rajpo02175;Rajpo11832;Rajpo00329;Rajpo13252;Rajpo14591;Rajpo18871;Rajpo09719;Rajpo15372;Rajpo15509;Rajpo05917;Rajpo18584;Rajpo12330;Rajpo00801;Rajpo19106	K06825+K04498+K19559+K04679+K04514+K04671+K03347+K04678+K03456+K04675+K04388+K23096+K13578+K04673+K04670+K13596+K04500+K04676+K19631+K04663+K04666+K04371+K04660+K04677+K04382+K10162
Glycosaminoglycan biosynthesis - heparan sulfate / heparin	10	0.00358228	0.0202569	ko00534	Metabolism	Glycan biosynthesis and metabolism	Rajpo16014;Rajpo18104;Rajpo06017;Rajpo05136;Rajpo07779;Rajpo15233;Rajpo04364;Rajpo17960;Rajpo12112;Rajpo01170	K02577+K02579+K02576+K00771+K02366+K02514+K07809+K07808
Aminoacyl-tRNA biosynthesis	17	0.00362213	0.0202569	ko00970	Genetic Information Processing	Translation	Rajpo16663;Rajpo16679;Rajpo10507;Rajpo12118;Rajpo13935;Rajpo06096;Rajpo08320;Rajpo20815;Rajpo17133;Rajpo07600;Rajpo21368;Rajpo21347;Rajpo11759;Rajpo15713;Rajpo06225;Rajpo15023;Rajpo12738	K01883+K01870+K01885+K01880+K01887+K04567+K02433+K22503+K03341+K01892+K01889+K01867
VEGF signaling pathway	19	0.00371991	0.0202569	ko04370	Environmental Information Processing	Signal transduction	Rajpo05572;Rajpo20478;Rajpo06720;Rajpo13399;Rajpo21616;Rajpo21032;Rajpo14577;Rajpo08729;Rajpo16436;Rajpo05917;Rajpo16108;Rajpo05551;Rajpo16475;Rajpo05229;Rajpo10297;Rajpo05312;Rajpo10723;Rajpo16290;Rajpo05940	K05859+K00922+K04369+K02649+K05704+K04348+K04371+K04441+K07827+K02833+K04392+K07861+K06268
Circadian rhythm	12	0.00373181	0.0202569	ko04710	Organismal Systems	Environmental adaptation	Rajpo12451;Rajpo22645;Rajpo10108;Rajpo00677;Rajpo07866;Rajpo20006;Rajpo15812;Rajpo08482;Rajpo17495;Rajpo06166;Rajpo05321;Rajpo03988	K09026+K03347+K07198+K07200+K08533+K08532+K08959+K08960+K05870
Quorum sensing	5	0.00389227	0.0204096	ko02024	Cellular Processes	Cellular community - prokaryotes	Rajpo07808;Rajpo03589;Rajpo16631;Rajpo09507;Rajpo19251	K01897+K01580+K03106
Renin secretion	25	0.00393849	0.0204096	ko04924	Organismal Systems	Endocrine system	Rajpo08717;Rajpo01535;Rajpo06909;Rajpo04316;Rajpo16041;Rajpo12640;Rajpo06030;Rajpo08282;Rajpo12181;Rajpo14577;Rajpo08729;Rajpo16436;Rajpo10821;Rajpo18878;Rajpo13839;Rajpo06209;Rajpo03988;Rajpo08467;Rajpo16448;Rajpo14637;Rajpo21048;Rajpo21672;Rajpo05940;Rajpo04824;Rajpo18634	K04958+K04851+K04857+K01283+K04936+K19477+K13296+K08045+K13755+K04348+K04632+K04197+K04345+K05870+K04634+K04630+K04265+K06268+K02183
Estrogen signaling pathway	40	0.00416158	0.02115	ko04915	Organismal Systems	Endocrine system	Rajpo08717;Rajpo04670;Rajpo05039;Rajpo21732;Rajpo12991;Rajpo03655;Rajpo08282;Rajpo11243;Rajpo01370;Rajpo01371;Rajpo21576;Rajpo20478;Rajpo17647;Rajpo13816;Rajpo06720;Rajpo06312;Rajpo13399;Rajpo05059;Rajpo21616;Rajpo11113;Rajpo21032;Rajpo19844;Rajpo02342;Rajpo10970;Rajpo10821;Rajpo06719;Rajpo02934;Rajpo13839;Rajpo06209;Rajpo05917;Rajpo03988;Rajpo08467;Rajpo16448;Rajpo14637;Rajpo21048;Rajpo05229;Raj…	K04958+K11256+K03099+K08048+K08045+K08041+K04603+K08042+K00922+K04615+K04369+K08556+K02649+K04079+K17448+K05704+K09048+K04450+K09571+K04632+K04534+K04345+K04371+K05870+K04634+K04630+K07827+K02833+K04364+K02183
Ras signaling pathway	62	0.00451482	0.0226351	ko04014	Environmental Information Processing	Signal transduction	Rajpo11386;Rajpo13571;Rajpo12237;Rajpo00989;Rajpo10314;Rajpo04452;Rajpo06873;Rajpo05039;Rajpo21732;Rajpo02857;Rajpo05572;Rajpo02029;Rajpo05182;Rajpo20478;Rajpo02679;Rajpo14537;Rajpo00956;Rajpo19747;Rajpo06720;Rajpo00209;Rajpo22835;Rajpo01906;Rajpo12492;Rajpo13399;Rajpo16048;Rajpo21616;Rajpo21790;Rajpo11113;Rajpo14961;Rajpo14927;Rajpo08070;Rajpo12064;Rajpo14576;Rajpo00872;Rajpo14770;Rajpo07832;Raj…	K08052+K05860+K05702+K25769+K05209+K17633+K05097+K03099+K04527+K05859+K06619+K01115+K00922+K14958+K09593+K18529+K17637+K04369+K04360+K04350+K05734+K17630+K02649+K04467+K05736+K17448+K09254+K10632+K05733+K19613+K04411+K05466+K05449+K04539+K08015+K09850+K04345+K04371+K05450+K04536+K07825+K04358+K07827+K02833+K04364+K04392+K07861+K07887+K07888+K07830+K07836+K18496+K02183
Citrate cycle (TCA cycle)	13	0.00474541	0.023474	ko00020	Metabolism	Carbohydrate metabolism	Rajpo02747;Rajpo02748;Rajpo16030;Rajpo16730;Rajpo07060;Rajpo20490;Rajpo22844;Rajpo20928;Rajpo16175;Rajpo13238;Rajpo09802;Rajpo00257;Rajpo14490	K01958+K00164+K01681+K00234+K00627+K00382+K01679+K00031+K00658+K01900+K01899
Other types of O-glycan biosynthesis	18	0.00497625	0.0240628	ko00514	Metabolism	Glycan biosynthesis and metabolism	Rajpo10558;Rajpo02022;Rajpo20914;Rajpo18656;Rajpo13842;Rajpo01991;Rajpo21317;Rajpo07313;Rajpo21473;Rajpo20691;Rajpo04156;Rajpo17646;Rajpo17644;Rajpo15590;Rajpo06942;Rajpo11694;Rajpo09940;Rajpo03173	K09667+K00728+K00710+K11703+K13676+K00781+K07968
Butanoate metabolism	10	0.00499416	0.0240628	ko00650	Metabolism	Carbohydrate metabolism	Rajpo00823;Rajpo03184;Rajpo08962;Rajpo08963;Rajpo16631;Rajpo09507;Rajpo10089;Rajpo03558;Rajpo15374;Rajpo00795	K07515+K01907+K01896+K01580+K01641+K13524+K01640+K00022
Signaling pathways regulating pluripotency of stem cells	39	0.00523115	0.0248815	ko04550	Cellular Processes	Cellular community - eukaryotes	Rajpo02664;Rajpo08237;Rajpo00294;Rajpo20478;Rajpo04558;Rajpo06720;Rajpo08965;Rajpo19878;Rajpo13399;Rajpo21616;Rajpo15891;Rajpo09698;Rajpo11003;Rajpo02806;Rajpo18126;Rajpo02175;Rajpo11832;Rajpo00329;Rajpo11281;Rajpo14591;Rajpo18871;Rajpo17117;Rajpo22463;Rajpo19461;Rajpo15509;Rajpo02948;Rajpo13138;Rajpo14511;Rajpo01224;Rajpo05917;Rajpo16108;Rajpo05551;Rajpo16475;Rajpo22098;Rajpo05229;Rajpo10297;Raj…	K11478+K04447+K04671+K00922+K14439+K04369+K02157+K02376+K02649+K02353+K04675+K13578+K04673+K04670+K13596+K15613+K04500+K04676+K03083+K00444+K01064+K04666+K00182+K00572+K04371+K04441+K00312+K07827+K02833+K04364+K11488+K11487
T cell receptor signaling pathway	35	0.00532695	0.0250164	ko04660	Organismal Systems	Immune system	Rajpo05039;Rajpo21732;Rajpo06849;Rajpo20478;Rajpo05597;Rajpo13758;Rajpo06720;Rajpo11638;Rajpo08180;Rajpo22835;Rajpo01906;Rajpo13399;Rajpo22314;Rajpo16048;Rajpo21616;Rajpo21790;Rajpo13199;Rajpo13552;Rajpo12102;Rajpo14577;Rajpo08729;Rajpo16436;Rajpo08070;Rajpo02385;Rajpo09394;Rajpo17117;Rajpo05917;Rajpo16108;Rajpo05551;Rajpo16475;Rajpo05229;Rajpo10297;Rajpo04111;Rajpo08995;Rajpo05940	K03099+K07367+K00922+K22517+K17333+K04369+K05730+K07369+K04350+K05734+K02649+K04467+K05736+K07364+K05703+K06276+K04348+K05733+K04431+K07365+K03083+K04371+K04441+K07827+K02833+K04364+K04427+K06268
RNA degradation	23	0.00578925	0.0268476	ko03018	Genetic Information Processing	Folding, sorting and degradation	Rajpo04491;Rajpo00022;Rajpo01474;Rajpo13956;Rajpo04438;Rajpo08959;Rajpo21145;Rajpo05161;Rajpo12652;Rajpo17831;Rajpo01241;Rajpo01534;Rajpo01697;Rajpo01747;Rajpo03335;Rajpo02774;Rajpo14568;Rajpo11900;Rajpo15382;Rajpo07547;Rajpo06468;Rajpo08040;Rajpo05935	K12600+K12598+K18681+K12585+K12580+K01148+K12621+K12605+K12603+K12611+K12610+K01689+K04077+K12615+K03678+K12584+K12602+K12581+K12623+K12592
Fc epsilon RI signaling pathway	25	0.00620087	0.0280552	ko04664	Organismal Systems	Immune system	Rajpo05039;Rajpo21732;Rajpo05572;Rajpo22542;Rajpo20478;Rajpo06720;Rajpo11638;Rajpo13399;Rajpo21616;Rajpo13552;Rajpo12102;Rajpo02311;Rajpo02385;Rajpo05917;Rajpo12134;Rajpo20064;Rajpo16108;Rajpo05551;Rajpo16475;Rajpo05229;Rajpo10297;Rajpo04111;Rajpo05312;Rajpo10723;Rajpo16290	K03099+K05859+K03084+K00922+K04369+K05730+K02649+K05703+K06276+K05854+K04431+K04371+K04432+K04433+K04441+K07827+K02833+K04364+K04392+K07861
Autophagy - other	12	0.00643326	0.0287559	ko04136	Cellular Processes	Transport and catabolism	Rajpo19232;Rajpo11400;Rajpo11021;Rajpo06395;Rajpo17170;Rajpo14153;Rajpo01610;Rajpo18201;Rajpo04505;Rajpo12582;Rajpo00801;Rajpo08324	K17906+K08269+K00914+K17907+K08337+K08342+K08334+K17908+K08343+K04382+K08341
Pentose phosphate pathway	10	0.00680727	0.0300654	ko00030	Metabolism	Carbohydrate metabolism	Rajpo13494;Rajpo01533;Rajpo07113;Rajpo14159;Rajpo05810;Rajpo01270;Rajpo01271;Rajpo08329;Rajpo10995;Rajpo14489	K00948+K00615+K11529+K01835+K00033+K03841+K00852+K01807
Sulfur relay system	4	0.00758324	0.0330986	ko04122	Genetic Information Processing	Folding, sorting and degradation	Rajpo12280;Rajpo19120;Rajpo00871;Rajpo00633	K14169+K11996+K04487+K03635
Propanoate metabolism	12	0.00826534	0.0344668	ko00640	Metabolism	Carbohydrate metabolism	Rajpo11207;Rajpo00823;Rajpo08231;Rajpo06157;Rajpo18999;Rajpo20928;Rajpo03558;Rajpo05578;Rajpo00257;Rajpo12626;Rajpo14841;Rajpo14490	K11262+K07515+K01908+K01895+K09699+K00382+K13524+K01578+K01900+K05605+K00167+K01899
Growth hormone synthesis, secretion and action	43	0.00826832	0.0344668	ko04935	Organismal Systems	Endocrine system	Rajpo08717;Rajpo21889;Rajpo01535;Rajpo06909;Rajpo05039;Rajpo21732;Rajpo05572;Rajpo12991;Rajpo03655;Rajpo08282;Rajpo11243;Rajpo08237;Rajpo21576;Rajpo20478;Rajpo06720;Rajpo00998;Rajpo01620;Rajpo13399;Rajpo21616;Rajpo11113;Rajpo19844;Rajpo02342;Rajpo10821;Rajpo06719;Rajpo17117;Rajpo13839;Rajpo06209;Rajpo05917;Rajpo12134;Rajpo20064;Rajpo03988;Rajpo16108;Rajpo05551;Rajpo15950;Rajpo08467;Rajpo16475;Raj…	K04958+K04498+K04851+K04857+K03099+K05859+K08048+K08045+K08041+K04447+K08042+K00922+K04369+K11220+K11224+K02649+K17448+K09048+K04450+K04632+K03083+K04345+K04371+K04432+K04433+K05870+K04441+K04635+K04634+K04630+K07827+K02833+K04364+K05726
C-type lectin receptor signaling pathway	31	0.00859192	0.0350286	ko04625	Organismal Systems	Immune system	Rajpo08717;Rajpo22890;Rajpo05572;Rajpo10324;Rajpo20478;Rajpo05597;Rajpo13758;Rajpo02679;Rajpo21931;Rajpo00998;Rajpo08180;Rajpo13399;Rajpo22314;Rajpo16048;Rajpo21616;Rajpo21032;Rajpo14577;Rajpo08729;Rajpo16436;Rajpo05917;Rajpo16108;Rajpo05551;Rajpo16475;Rajpo05229;Rajpo10297;Rajpo02715;Rajpo16505;Rajpo06033;Rajpo05940;Rajpo04824;Rajpo18634	K04958+K07532+K05859+K12800+K00922+K22517+K17333+K14958+K08601+K11220+K07369+K02649+K04467+K05704+K04348+K04371+K04441+K07827+K02833+K08862+K07830+K06268+K02183
Renin-angiotensin system	8	0.00898088	0.0362164	ko04614	Organismal Systems	Endocrine system	Rajpo04316;Rajpo20258;Rajpo03830;Rajpo13351;Rajpo07996;Rajpo02868;Rajpo14037;Rajpo14038	K01283+K11141+K01322+K01389+K01392+K13289
Tight junction	54	0.00910241	0.0363118	ko04530	Cellular Processes	Cellular community - eukaryotes	Rajpo01535;Rajpo16503;Rajpo16518;Rajpo11998;Rajpo12237;Rajpo04629;Rajpo04631;Rajpo05815;Rajpo20282;Rajpo00262;Rajpo03664;Rajpo12264;Rajpo17112;Rajpo17003;Rajpo05387;Rajpo10562;Rajpo01905;Rajpo03800;Rajpo04150;Rajpo18395;Rajpo18484;Rajpo22851;Rajpo04878;Rajpo07085;Rajpo18748;Rajpo08659;Rajpo06911;Rajpo20696;Rajpo02837;Rajpo09229;Rajpo10626;Rajpo11163;Rajpo21032;Rajpo11257;Rajpo10108;Rajpo00677;Raj…	K04851+K06095+K10352+K05702+K16175+K08020+K08018+K05631+K04514+K21110+K04426+K06094+K16819+K21098+K05699+K06105+K21111+K18050+K03456+K05762+K08007+K07374+K04354+K05704+K18952+K07198+K07200+K08367+K07298+K06093+K17260+K04431+K04345+K05692+K04382+K04392+K07901+K07902+K12755
Tryptophan metabolism	15	0.00988062	0.0385864	ko00380	Metabolism	Amino acid metabolism	Rajpo16989;Rajpo00823;Rajpo09202;Rajpo11879;Rajpo21742;Rajpo11399;Rajpo20928;Rajpo15558;Rajpo16181;Rajpo02153;Rajpo09802;Rajpo08128;Rajpo22225;Rajpo20077;Rajpo00795	K15791+K07515+K00502+K03781+K00274+K00128+K00382+K01593+K01556+K00658+K00452+K00543+K01432+K00022
Isoquinoline alkaloid biosynthesis	6	0.0105513	0.0405766	ko00950	Metabolism	Biosynthesis of other secondary metabolites	Rajpo21742;Rajpo16654;Rajpo15558;Rajpo16181;Rajpo14040;Rajpo11250	K00274+K00501+K01593+K14455+K14454
GABAergic synapse	40	0.010609	0.0405766	ko04727	Organismal Systems	Nervous system	Rajpo03439;Rajpo05793;Rajpo05794;Rajpo13479;Rajpo01535;Rajpo06909;Rajpo12991;Rajpo03655;Rajpo08282;Rajpo11243;Rajpo21015;Rajpo21736;Rajpo21576;Rajpo17647;Rajpo13816;Rajpo00997;Rajpo16451;Rajpo21032;Rajpo16631;Rajpo09507;Rajpo15067;Rajpo16220;Rajpo21120;Rajpo15068;Rajpo16222;Rajpo21118;Rajpo03558;Rajpo16219;Rajpo21121;Rajpo02934;Rajpo13668;Rajpo13839;Rajpo06209;Rajpo17943;Rajpo16448;Rajpo14637;Raj…	K04344+K04849+K04851+K04857+K08048+K08045+K08041+K23967+K15375+K08042+K04615+K01425+K13576+K05704+K01580+K05175+K05181+K13524+K05186+K04534+K04539+K04345+K01915+K04630+K04536+K07825+K08341
N-Glycan biosynthesis	17	0.0114906	0.0430607	ko00510	Metabolism	Glycan biosynthesis and metabolism	Rajpo17081;Rajpo12529;Rajpo03236;Rajpo03237;Rajpo05491;Rajpo20613;Rajpo05790;Rajpo21035;Rajpo08611;Rajpo19909;Rajpo06868;Rajpo15083;Rajpo11576;Rajpo03173;Rajpo09051;Rajpo07914;Rajpo02019	K01231+K07151+K00744+K12666+K23741+K12667+K01230+K00738+K00729+K07968+K00721+K07441+K09658
GnRH signaling pathway	34	0.0117166	0.0434687	ko04912	Organismal Systems	Endocrine system	Rajpo08717;Rajpo01535;Rajpo06909;Rajpo12247;Rajpo05039;Rajpo21732;Rajpo12991;Rajpo03655;Rajpo08282;Rajpo11243;Rajpo21576;Rajpo05182;Rajpo06720;Rajpo04229;Rajpo21032;Rajpo16015;Rajpo18107;Rajpo10821;Rajpo02385;Rajpo13839;Rajpo06209;Rajpo05917;Rajpo12134;Rajpo20064;Rajpo16108;Rajpo05551;Rajpo15950;Rajpo08467;Rajpo16475;Rajpo05229;Rajpo10297;Rajpo04111;Rajpo04824;Rajpo18634	K04958+K04851+K04857+K04428+K03099+K08048+K08045+K08041+K08042+K01115+K04369+K04515+K05704+K04632+K04431+K04345+K04371+K04432+K04433+K04441+K04635+K04634+K07827+K02833+K04364+K02183
DNA replication	12	0.0131275	0.0480001	ko03030	Genetic Information Processing	Replication and repair	Rajpo05847;Rajpo06111;Rajpo21367;Rajpo09187;Rajpo11404;Rajpo04921;Rajpo05051;Rajpo10802;Rajpo01016;Rajpo00955;Rajpo16798;Rajpo15304	K02324+K02327+K02542+K02541+K07466+K10755+K02325+K10744+K10756+K10743+K10740
Geraniol degradation	3	0.0145734	0.0514927	ko00281	Metabolism	Metabolism of terpenoids and polyketides	Rajpo13799;Rajpo15374;Rajpo00795	K11731+K01640+K00022
Basal transcription factors	13	0.0147253	0.0515387	ko03022	Genetic Information Processing	Transcription	Rajpo10557;Rajpo10998;Rajpo04662;Rajpo12487;Rajpo06809;Rajpo20354;Rajpo05603;Rajpo07579;Rajpo05799;Rajpo13406;Rajpo02519;Rajpo01152;Rajpo07619	K03125+K03128+K03129+K03121+K14650+K03120+K03144+K03122+K02202+K14535+K03135
Betalain biosynthesis	4	0.0154508	0.0535725	ko00965	Metabolism	Biosynthesis of other secondary metabolites	Rajpo15558;Rajpo16181;Rajpo02491;Rajpo14354	K01593+K00545
Peroxisome	24	0.0157696	0.0541716	ko04146	Cellular Processes	Transport and catabolism	Rajpo11015;Rajpo13260;Rajpo05498;Rajpo12968;Rajpo07908;Rajpo09473;Rajpo07808;Rajpo03589;Rajpo08169;Rajpo09787;Rajpo02564;Rajpo11879;Rajpo05578;Rajpo13238;Rajpo22573;Rajpo02458;Rajpo18325;Rajpo05846;Rajpo02826;Rajpo15374;Rajpo07635;Rajpo09494;Rajpo16797;Rajpo08988	K00106+K13338+K05676+K05677+K12405+K01897+K00803+K05678+K11517+K03781+K01578+K00031+K00830+K00306+K01796+K13347+K13343+K01640+K13341+K13279+K04565
Proteasome	14	0.016059	0.0542095	ko03050	Genetic Information Processing	Folding, sorting and degradation	Rajpo07876;Rajpo18074;Rajpo16938;Rajpo19480;Rajpo00740;Rajpo13719;Rajpo04687;Rajpo19465;Rajpo02789;Rajpo08870;Rajpo06031;Rajpo20365;Rajpo12340;Rajpo15293	K06699+K03032+K03028+K03033+K03035+K03062+K03061+K03036+K03030+K02739+K02725+K02727+K02731+K10881
Oxytocin signaling pathway	58	0.0160729	0.0542095	ko04921	Organismal Systems	Endocrine system	Rajpo01039;Rajpo11762;Rajpo08717;Rajpo01535;Rajpo20686;Rajpo06909;Rajpo03664;Rajpo12991;Rajpo03655;Rajpo08282;Rajpo11243;Rajpo01239;Rajpo05550;Rajpo22465;Rajpo01542;Rajpo21576;Rajpo09571;Rajpo13758;Rajpo06720;Rajpo04229;Rajpo19518;Rajpo19519;Rajpo21032;Rajpo14577;Rajpo08729;Rajpo16436;Rajpo10108;Rajpo00677;Rajpo16015;Rajpo18107;Rajpo07866;Rajpo20006;Rajpo22292;Rajpo12325;Rajpo10821;Rajpo02934;Raj…	K04961+K04958+K04851+K00907+K04857+K04514+K08048+K08045+K08041+K04861+K04858+K04860+K08042+K12324+K17333+K04369+K04515+K04862+K05704+K04348+K07198+K07200+K04454+K04463+K04632+K04534+K08794+K04345+K05692+K04371+K04634+K04630+K06269+K07827+K02833+K04868+K04867+K17901+K06268+K12755+K02183
Relaxin signaling pathway	44	0.0165434	0.0552938	ko04926	Organismal Systems	Endocrine system	Rajpo06830;Rajpo00957;Rajpo05039;Rajpo21732;Rajpo12991;Rajpo03655;Rajpo08282;Rajpo11243;Rajpo21576;Rajpo20478;Rajpo06720;Rajpo13399;Rajpo21616;Rajpo11113;Rajpo10191;Rajpo21032;Rajpo11257;Rajpo06925;Rajpo19844;Rajpo02342;Rajpo15951;Rajpo14591;Rajpo10821;Rajpo06719;Rajpo02934;Rajpo07832;Rajpo13668;Rajpo02385;Rajpo13839;Rajpo06209;Rajpo17739;Rajpo05917;Rajpo03988;Rajpo16108;Rajpo05551;Rajpo16475;Raj…	K06237+K13240+K03099+K08048+K08045+K08041+K08042+K00922+K04369+K02649+K17448+K04388+K05704+K18952+K09048+K04450+K04637+K04500+K04632+K04534+K05449+K04539+K04431+K04345+K12313+K04371+K05870+K04441+K04630+K04536+K07825+K07827+K02833+K04364
Carbon fixation in photosynthetic organisms	8	0.0169295	0.0560788	ko00710	Metabolism	Energy metabolism	Rajpo16746;Rajpo21390;Rajpo01533;Rajpo14040;Rajpo11250;Rajpo01270;Rajpo01271;Rajpo14489	K00029+K00615+K14455+K14454+K03841+K01807
Leukocyte transendothelial migration	33	0.0197508	0.0642769	ko04670	Organismal Systems	Immune system	Rajpo12237;Rajpo20586;Rajpo03664;Rajpo05572;Rajpo15976;Rajpo20478;Rajpo01571;Rajpo01572;Rajpo08765;Rajpo13463;Rajpo01905;Rajpo05976;Rajpo12882;Rajpo11638;Rajpo19795;Rajpo13399;Rajpo13744;Rajpo21616;Rajpo07085;Rajpo02238;Rajpo12357;Rajpo12361;Rajpo16108;Rajpo05551;Rajpo16475;Rajpo16448;Rajpo14637;Rajpo21048;Rajpo06320;Rajpo05312;Rajpo16290;Rajpo08203;Rajpo15242	K05702+K05732+K04514+K05859+K05700+K00922+K05691+K05699+K05730+K06464+K02649+K21421+K08007+K08015+K05692+K04441+K04630+K05726+K04392+K07836+K12755
Endocrine and other factor-regulated calcium reabsorption	15	0.0239064	0.0739147	ko04961	Organismal Systems	Excretory system	Rajpo11420;Rajpo08665;Rajpo18590;Rajpo04127;Rajpo09975;Rajpo01067;Rajpo01994;Rajpo10164;Rajpo12598;Rajpo11101;Rajpo10821;Rajpo13839;Rajpo06209;Rajpo08467;Rajpo01476	K04646+K05850+K11825+K01528+K23484+K01539+K04632+K04345+K04634+K07904
Pyrimidine metabolism	17	0.0252289	0.0765685	ko00240	Metabolism	Nucleotide metabolism	Rajpo07769;Rajpo19127;Rajpo08258;Rajpo12884;Rajpo07774;Rajpo14691;Rajpo17243;Rajpo01642;Rajpo05957;Rajpo12864;Rajpo09779;Rajpo16139;Rajpo21838;Rajpo08027;Rajpo00383;Rajpo15321;Rajpo10163	K11540+K00207+K01513+K00876+K01081+K19970+K01511+K00757+K01493
Sphingolipid metabolism	18	0.0256043	0.0765685	ko00600	Metabolism	Lipid metabolism	Rajpo05861;Rajpo09566;Rajpo05652;Rajpo21526;Rajpo21065;Rajpo16271;Rajpo18105;Rajpo09770;Rajpo11125;Rajpo13044;Rajpo16604;Rajpo09066;Rajpo06060;Rajpo02355;Rajpo00794;Rajpo11300;Rajpo12744;Rajpo09493	K12353+K17108+K12349+K12309+K01634+K00654+K04628+K23727+K09905+K07553+K00720+K04714+K04712+K01080
Indole alkaloid biosynthesis	2	0.025798	0.0765685	ko00901	Metabolism	Biosynthesis of other secondary metabolites	Rajpo15558;Rajpo16181	K01593
Monobactam biosynthesis	2	0.025798	0.0765685	ko00261	Metabolism	Biosynthesis of other secondary metabolites	Rajpo00793;Rajpo05655	K13811
Mismatch repair	8	0.0289697	0.0852998	ko03430	Genetic Information Processing	Replication and repair	Rajpo06111;Rajpo01753;Rajpo07698;Rajpo11404;Rajpo04921;Rajpo01016;Rajpo00955;Rajpo15304	K02327+K08735+K08734+K07466+K10755+K10756+K10740
Glyoxylate and dicarboxylate metabolism	10	0.0300669	0.0869914	ko00630	Metabolism	Carbohydrate metabolism	Rajpo13927;Rajpo07060;Rajpo06157;Rajpo02564;Rajpo07113;Rajpo11879;Rajpo20928;Rajpo22573;Rajpo17943;Rajpo20077	K00281+K01681+K01895+K11517+K11529+K03781+K00382+K00830+K01915+K01432
Chemokine signaling pathway	47	0.0302477	0.0869914	ko04062	Organismal Systems	Immune system	Rajpo14674;Rajpo05039;Rajpo21732;Rajpo03664;Rajpo05572;Rajpo12991;Rajpo03655;Rajpo08282;Rajpo11243;Rajpo08237;Rajpo21576;Rajpo20478;Rajpo11638;Rajpo00998;Rajpo01620;Rajpo13399;Rajpo16048;Rajpo14094;Rajpo21616;Rajpo05839;Rajpo11603;Rajpo11113;Rajpo08238;Rajpo10635;Rajpo03720;Rajpo21032;Rajpo11257;Rajpo02311;Rajpo13668;Rajpo17117;Rajpo13839;Rajpo06209;Rajpo05917;Rajpo08467;Rajpo16448;Rajpo14637;Raj…	K12365+K03099+K04514+K05859+K08048+K08045+K08041+K04447+K08042+K00922+K05730+K11220+K11224+K02649+K04467+K12366+K00910+K09408+K17448+K08291+K05704+K18952+K05854+K04539+K03083+K04345+K04371+K04634+K04630+K04536+K07825+K07827+K02833+K04364+K05726+K04392+K07861+K07836
cAMP signaling pathway	70	0.0314173	0.0896603	ko04024	Environmental Information Processing	Signal transduction	Rajpo21889;Rajpo13571;Rajpo01535;Rajpo12237;Rajpo06909;Rajpo10314;Rajpo03664;Rajpo01352;Rajpo18590;Rajpo04127;Rajpo12991;Rajpo03655;Rajpo15939;Rajpo21491;Rajpo06030;Rajpo08282;Rajpo11243;Rajpo21576;Rajpo05182;Rajpo21149;Rajpo18801;Rajpo20478;Rajpo14944;Rajpo04910;Rajpo12598;Rajpo11101;Rajpo20273;Rajpo17647;Rajpo13816;Rajpo11696;Rajpo14731;Rajpo06720;Rajpo14974;Rajpo11638;Rajpo19907;Rajpo16446;Raj…	K04498+K05860+K04851+K05702+K04857+K05209+K04514+K05673+K05850+K08048+K04955+K04957+K13296+K08045+K08041+K08042+K01115+K05213+K05214+K00922+K05853+K01539+K05198+K04615+K05199+K05200+K04369+K18438+K05730+K05742+K13293+K02649+K04950+K04515+K09048+K07294+K04632+K04197+K04913+K04579+K04345+K04371+K05870+K04630+K06269+K26206+K04265+K04392+K07861+K07830+K07836+K12755+K02183
Various types of N-glycan biosynthesis	14	0.0316769	0.0897108	ko00513	Metabolism	Glycan biosynthesis and metabolism	Rajpo11893;Rajpo17081;Rajpo12529;Rajpo20613;Rajpo05790;Rajpo21035;Rajpo08611;Rajpo19909;Rajpo06868;Rajpo15083;Rajpo01360;Rajpo09940;Rajpo03173;Rajpo07914	K09657+K01231+K07151+K12666+K23741+K12667+K01230+K00738+K14459+K00781+K07968+K07441
Osteoclast differentiation	29	0.0347569	0.0976878	ko04380	Organismal Systems	Development and regeneration	Rajpo05572;Rajpo20478;Rajpo21931;Rajpo00998;Rajpo13399;Rajpo16048;Rajpo21616;Rajpo13199;Rajpo10191;Rajpo02610;Rajpo13552;Rajpo14577;Rajpo08729;Rajpo16436;Rajpo13811;Rajpo05774;Rajpo06925;Rajpo02385;Rajpo05917;Rajpo20064;Rajpo03988;Rajpo16108;Rajpo05551;Rajpo16475;Rajpo04111;Rajpo05312;Rajpo16290;Rajpo08995;Rajpo05940	K05859+K00922+K08601+K11220+K02649+K04467+K07364+K04388+K07371+K05703+K04348+K04576+K03173+K04431+K04371+K04433+K05870+K04441+K04364+K04392+K04427+K06268
Aldosterone synthesis and secretion	33	0.0371731	0.102919	ko04925	Organismal Systems	Endocrine system	Rajpo08717;Rajpo01535;Rajpo06909;Rajpo18590;Rajpo04127;Rajpo12991;Rajpo03655;Rajpo08282;Rajpo11243;Rajpo21576;Rajpo02990;Rajpo12598;Rajpo11101;Rajpo17953;Rajpo18395;Rajpo18484;Rajpo04229;Rajpo12421;Rajpo16015;Rajpo18107;Rajpo19844;Rajpo02342;Rajpo10821;Rajpo06719;Rajpo16490;Rajpo16986;Rajpo13839;Rajpo06209;Rajpo03988;Rajpo15950;Rajpo08467;Rajpo04824;Rajpo18634	K04958+K04851+K04857+K05850+K08048+K08045+K08041+K08042+K13806+K01539+K06070+K18050+K04515+K13885+K09048+K04450+K04632+K08794+K04345+K05870+K04635+K04634+K02183
Aldosterone-regulated sodium reabsorption	11	0.0390631	0.106562	ko04960	Organismal Systems	Excretory system	Rajpo02857;Rajpo20478;Rajpo12598;Rajpo11101;Rajpo14447;Rajpo13399;Rajpo21616;Rajpo12102;Rajpo07621;Rajpo05917;Rajpo05229	K04527+K00922+K01539+K08555+K02649+K06276+K13302+K04371+K07827
Cardiac muscle contraction	21	0.0412335	0.111661	ko04260	Organismal Systems	Circulatory system	Rajpo01535;Rajpo06909;Rajpo01239;Rajpo05550;Rajpo22465;Rajpo01542;Rajpo14944;Rajpo04910;Rajpo15163;Rajpo15164;Rajpo12598;Rajpo11101;Rajpo19907;Rajpo15054;Rajpo19518;Rajpo19519;Rajpo12593;Rajpo22919;Rajpo21974;Rajpo22738;Rajpo12663	K04851+K04857+K04861+K04858+K04860+K05853+K00476+K01539+K05742+K12041+K04862+K23445+K12314+K04868+K04867+K10374
Protein processing in endoplasmic reticulum	46	0.0440311	0.117522	ko04141	Genetic Information Processing	Folding, sorting and degradation	Rajpo04363;Rajpo20486;Rajpo17112;Rajpo06445;Rajpo02939;Rajpo12529;Rajpo18100;Rajpo12120;Rajpo14110;Rajpo05259;Rajpo14972;Rajpo19249;Rajpo14547;Rajpo07063;Rajpo12182;Rajpo22645;Rajpo16346;Rajpo05059;Rajpo22582;Rajpo08714;Rajpo20613;Rajpo05790;Rajpo21035;Rajpo08611;Rajpo19909;Rajpo17698;Rajpo05774;Rajpo09252;Rajpo16143;Rajpo11577;Rajpo08187;Rajpo18362;Rajpo02385;Rajpo06702;Rajpo15022;Rajpo16066;Raj…	K11718+K10597+K04426+K13525+K08653+K07151+K14007+K08852+K10086+K14018+K14006+K09485+K09502+K09530+K03347+K14026+K04079+K10085+K10084+K12666+K23741+K12667+K01230+K08288+K03173+K09521+K06689+K09523+K10080+K10976+K04431+K08057+K09518+K14010+K10082+K09517+K04555+K14021+K07953+K09525+K10575+K09481
Mucin type O-glycan biosynthesis	11	0.0463265	0.122765	ko00512	Metabolism	Glycan biosynthesis and metabolism	Rajpo20914;Rajpo21317;Rajpo07313;Rajpo21473;Rajpo20691;Rajpo04156;Rajpo17646;Rajpo17644;Rajpo15590;Rajpo06942;Rajpo09066	K00710+K09905

## Sheet: Sheet 2
Kegg enrichment analysis of 3,530 genes that overlapped with TcMar repeats in sharks and chimaeras.
Pathway	Gene number	P-value	Q-value	Pathway ID	Level 1	Level 2	Genes	KOs
Wnt signaling pathway	5	1.16793e-05	0.000619001	ko04310	Environmental Information Processing	Signal transduction	Pgl05G000930.1;Pgl15G003500.1;Pgl03G006380.1;Pgl03G006450.1;Pgl10G004800.1	K04512+K05128+K04508
GABAergic synapse	2	0.0114263	0.15009	ko04727	Organismal Systems	Nervous system	Pgl16G002220.1;Pgl02G004180.1	K23967+K04615
Axon guidance	2	0.0302208	0.26695	ko04360	Organismal Systems	Development and regeneration	Pgl03G006380.1;Pgl03G006450.1	K05128
